# Supplementary material for: Glial senescence enhances α-synuclein pathology owing to its insufficient clearance caused by autophagy dysfunction
Source: PubMed Central journal article supplement (PMC10811334; doi:10.1038/s41420-024-01816-8), 2024-01-26

Original image: Figure 2F

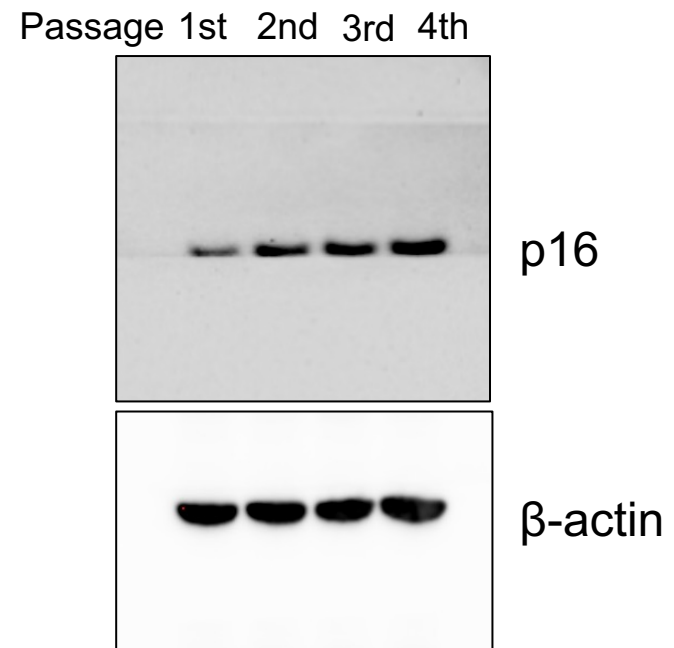

Original image: Figure 3B

Young glia

Senescent glia

Time (h) 0 1 2 6 24

Time (h) 0 1 2 6 24

Hu- $\alpha$ -syn

Hu- $\alpha$ -syn

$\beta$ -actin

$\beta$ -actin

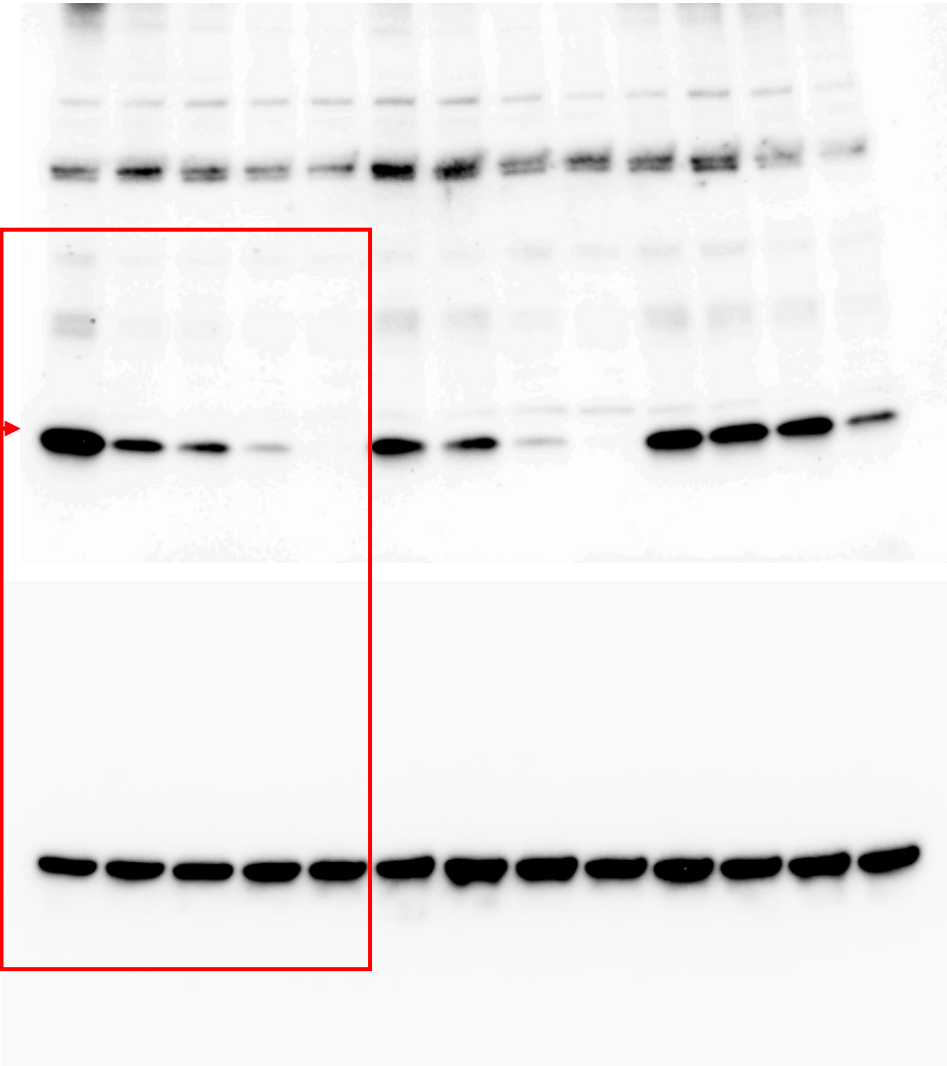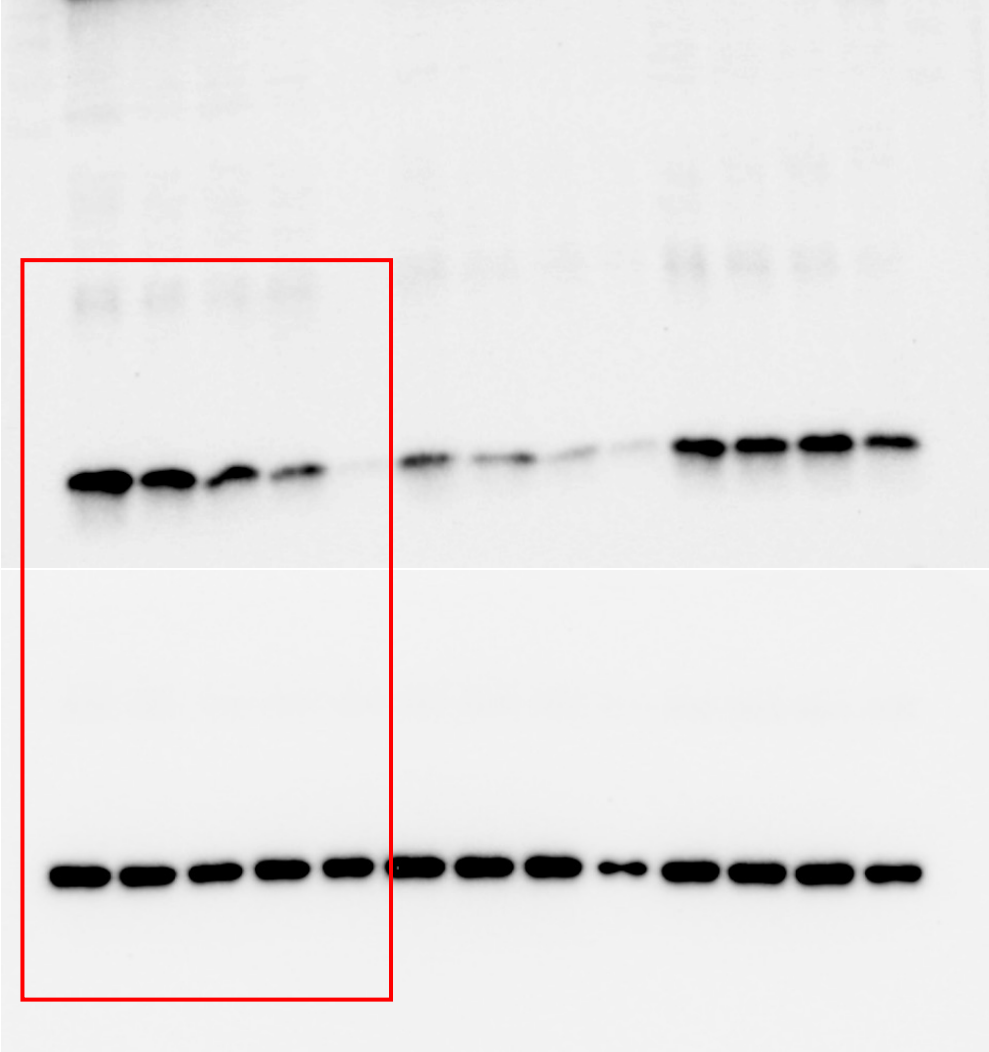

Original image: Figure 4B

Young glia

Senescent glia

Vehicle      MG-132 (20  $\mu$ M)      BafA1 (10 nM)  
Time (h)    0 1 2 6 24    1 2 6 24    1 2 6 24

Vehicle      MG-132 (20  $\mu$ M)      BafA1 (10 nM)  
0 1 2 6 24    1 2 6 24    1 2 6 24

Hu- $\alpha$ -syn

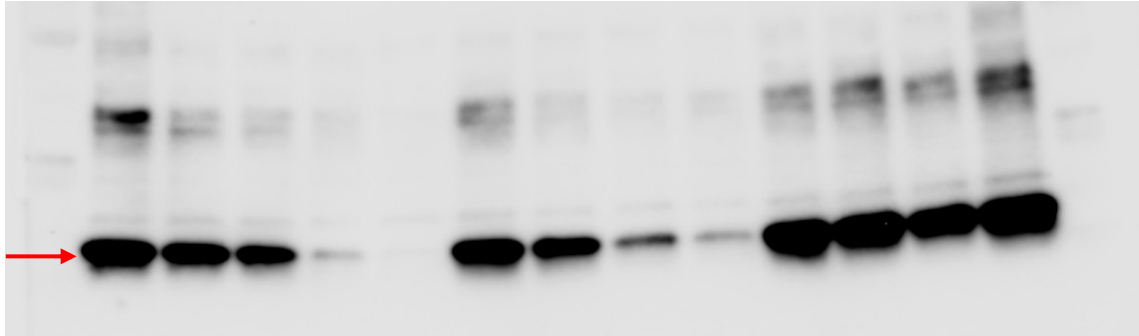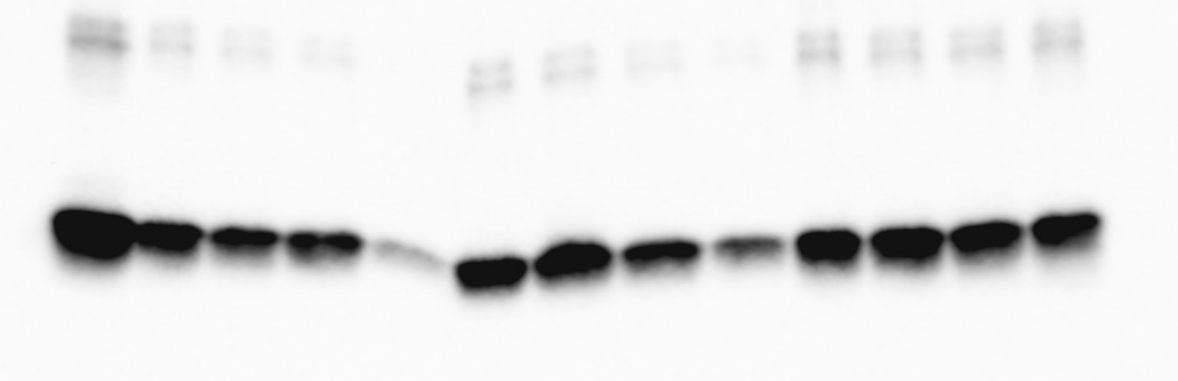

$\beta$ -actin

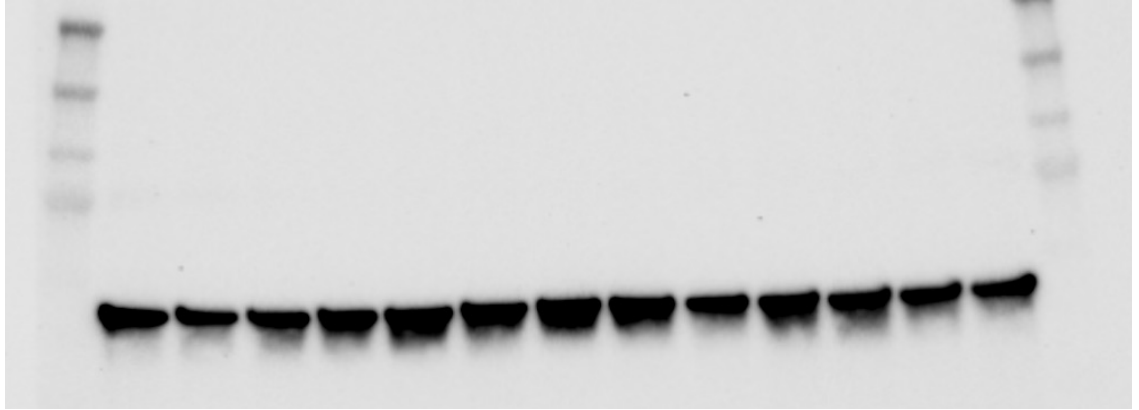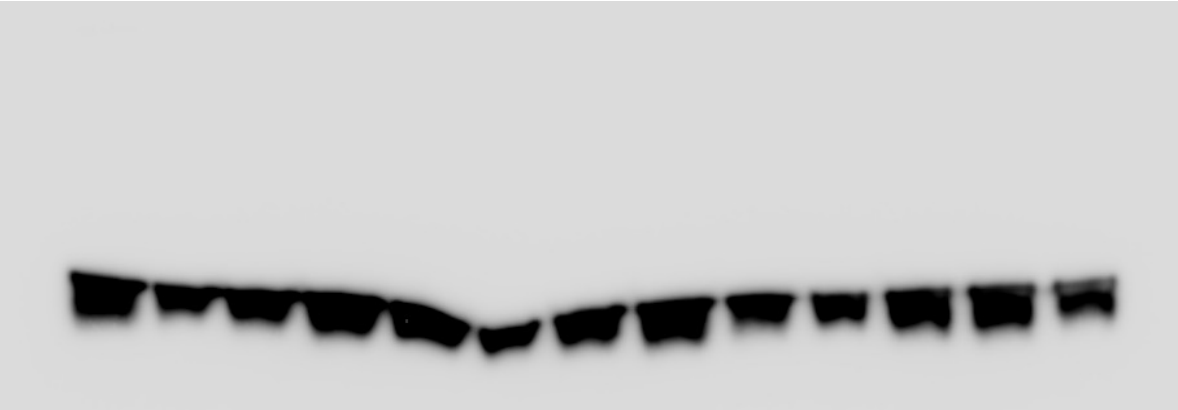

Supplement: 41420_2024_1816_MOESM1_ESM.pdf [file 41420_2024_1816_MOESM1_ESM.pdf]
